# Supplementary material for: Intersection of Poverty and Rurality for Early-Onset Colorectal Cancer Survival
Source: PubMed Central journal article supplement (PMC11358859; doi:10.1001/jamanetworkopen.2024.30615), 2024-08-28
Supplement: jamanetwopen-e2430615-s001.pdf [file jamanetwopen-e2430615-s001.pdf]

## Supplemental Online Content

Tsai MH, Coughlin SS, Cortes J, Thompson CA. Poverty, rurality, and early-onset colorectal cancer survival. *JAMA Netw Open*. 2024;7(8):e2430615. doi:10.1001/jamanetworkopen.2024.30615

### **eAppendix.** Study Design

This supplemental material has been provided by the authors to give readers additional information about their work.

## **eAppendix.** Study Design

Study design for eligible sample: First, patients diagnosed with colorectal cancer (CRC) defined by the SEER Site Recode ICD-O-3/WHO 2008 definition of colon cancer (C180–C189), rectosigmoid junction cancer (C199), and rectal cancer (C209) were used to select CRC patients through SEER\* stat. Furthermore, cause-specific death for CRC was defined by using SEER causes-specific death classification.
