# Supplementary material for: Intersection of Poverty and Rurality for Early-Onset Colorectal Cancer Survival
Source: PubMed Central journal article supplement (PMC11358859; doi:10.1001/jamanetworkopen.2024.30615), 2024-08-28
Supplement: jamanetwopen-e2430615-s002.pdf [file jamanetwopen-e2430615-s002.pdf]

## Data Sharing Statement

### Data

**Data available:** Yes

**Data types:** Other (please specify)

**Additional Information:** The datasets generated during the current study are available in the Surveillance, Epidemiology, and End Results Program (<https://seer.cancer.gov/>).

**How to access data:** The datasets generated during the current study are available in the Surveillance, Epidemiology, and End Results Program (<https://seer.cancer.gov/>)

**When available:** With publication

### Supporting Documents

**Document types:** None

### Additional Information

**Who can access the data:** Anyone requesting the data

**Types of analyses:** for any purpose

**Mechanisms of data availability:** without investigator support
